# Supplementary material for: DFT-based Green's function pathways model for prediction of bridge-mediated electronic coupling
Source: Royal Society of Chemistry journal article supplement (doi:10.1039/c5cp01861g), 2015-01-01
Supplement: c5cp01861g1.pdf [file c5cp01861g1.pdf]

## ***Ab-initio* Methodologies for Prediction of Bridge-Mediated Electronic Coupling: Through Space and Through Bond Interactions.**

Laura Berstis and Kim K. Baldridge\*

University of Zürich, OCI, Winterthurerstrasse 190, Zürich, CH-8057, Switzerland.

*KEYWORDS: Ab initio, Electronic coupling, Green's Function, Pathways Method*

**ABSTRACT:** A Density Functional Theory-based Green's Function Pathway Model is developed enabling further advancements towards the long-standing challenge of accurate yet inexpensive prediction of electron transfer rate. Electronic coupling predictions are demonstrated to within 0.1 eV of experiment for organic and biological systems of moderately large size, with modest computational expense. Benchmarking and comparisons are made across density functional type, basis set extent, and orbital localization scheme. The resulting framework is shown to be flexible and to offer quantitative prediction of both electronic coupling and tunneling pathways in covalently bound non-adiabatic donor-bridge-acceptor (D-B-A) systems. A new LMO-GFM Pathways adaptation enables a more intuitive understanding of electron tunneling in terms of through-bond and through-space interactions.

### **Electronic Supplementary Information**

**Table S1.** Basis set study of effective Hamiltonian predictions of  $T_{DA}$  with B97-D, as a function of basis set for Set A molecules 1-5.

| Method/Basis:         | $ T_{DA} $ (eV) |        |        |        |        |
|-----------------------|-----------------|--------|--------|--------|--------|
|                       | Molecule        |        |        |        |        |
|                       | 5               | 4      | 3      | 2      | 1      |
| B97-D/STO-3G          | 0.0126          | 0.0458 | 0.0575 | 0.1732 | 0.4445 |
| B97-D/STO-6G          | 0.0127          | 0.0468 | 0.0574 | 0.1744 | 0.4417 |
| B97-D/Def2-SVP        | 0.0224          | 0.0419 | 0.0748 | 0.1718 | 0.5469 |
| B97-D/3-21G           | 0.0214          | 0.0475 | 0.0692 | 0.1719 | 0.4771 |
| B97-D/6-31G           | 0.0209          | 0.0509 | 0.0692 | 0.1706 | 0.476  |
| B97-D/6-31G(d)        | 0.0209          | 0.0494 | 0.0701 | 0.1727 | 0.4858 |
| B97-D/6-31G(p)        | 0.0209          | 0.0386 | 0.069  | 0.1556 | 0.476  |
| B97-D/6-31G(d,p)      | 0.021           | 0.0392 | 0.0697 | 0.1567 | 0.4858 |
| B97-D/6-31G(2d,p)     | 0.0205          | 0.0386 | 0.0688 | 0.1558 | 0.4847 |
| B97-D/6-311G          | 0.021           | 0.0401 | 0.0684 | 0.1581 | 0.4781 |
| B97-D/6-311G(d)       | 0.0207          | 0.0391 | 0.068  | 0.1584 | 0.4803 |
| B97-D/6-311G(p)       | 0.0213          | 0.0387 | 0.0683 | 0.1543 | 0.4761 |
| B97-D/6-311G(d,p)     | 0.0211          | 0.0388 | 0.068  | 0.1536 | 0.4817 |
| B97-D/6-311G(2d,p)    | 0.0214          | 0.0393 | 0.0695 | 0.1556 | 0.483  |
| B97-D/6-311G(2df,2pd) | 0.0213          | 0.0389 | 0.0682 | 0.1531 | 0.4799 |
| B97-D/TZV(p)          | 0.0226          | 0.0408 | 0.0708 | 0.1592 | 0.4931 |
| B97-D/TZV(2p)         | 0.0228          | 0.0411 | 0.0713 | 0.1603 | 0.4931 |
| B97-D/Def2-TZVP       | 0.0217          | 0.0395 | 0.0684 | 0.1543 | 0.4783 |
| B97-D/Def2-TZVPP      | 0.0218          | 0.0397 | 0.0684 | 0.1543 | 0.4782 |
| B97-D/6-31+G(d,p)     | 0.0318          | DNC    | 0.1565 | 0.1933 | 0.484  |
| B97-D/6-31+G(2d,p)    | 0.0526          | 0.0644 | 0.1439 | 0.2179 | 0.5156 |
| B97-D/6-311+G         | DNC             | DNC    | 0.4455 | 0.349  | 0.5354 |
| B97-D/6-311+G(d,p)    | DNC             | DNC    | 0.1841 | 0.298  | 0.6294 |
| B97-D/6-311+G(2d,p)   | 0.0347          | DNC    | DNC    | 0.2454 | 0.6529 |

DNC= data not converged

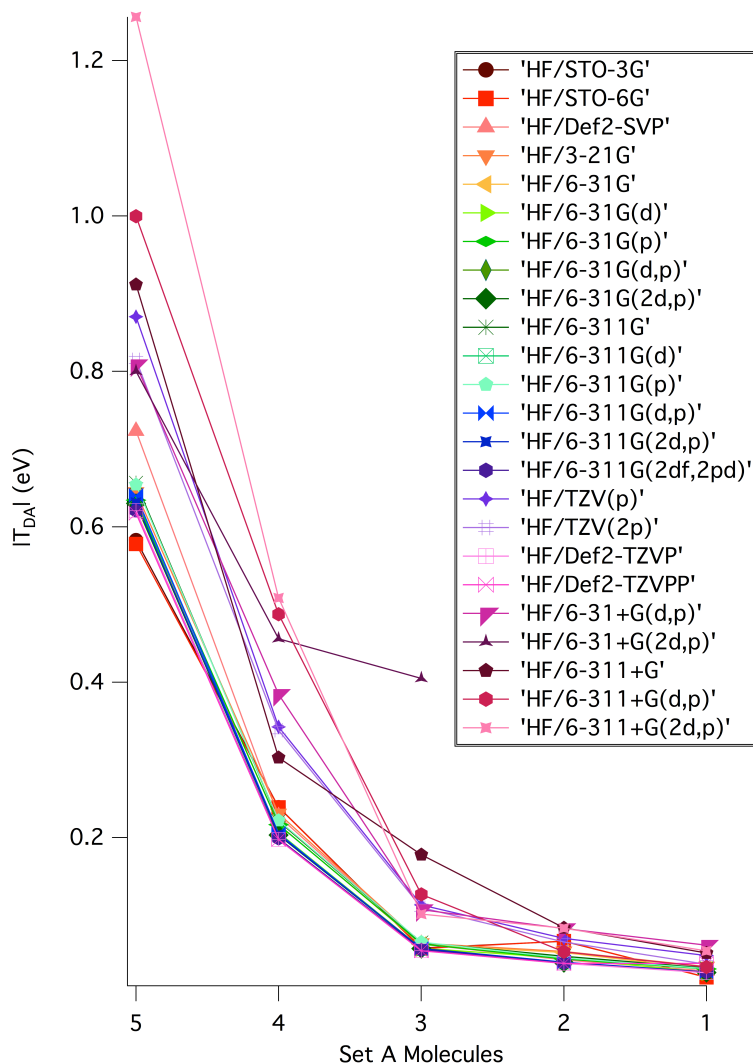

**Figure S1.** Analogous basis set study conducted with Hartree-Fock for  $T_{DA}$  predictions of Set A molecules 1-5, yielding the same overestimation of  $T_{DA}$  when pairing to diffuse basis sets.

**Table S2.** Raw data from Figure S1, for Hartree-Fock basis set study,  $T_{DA}$  predictions in (eV) for Set A molecules 1-5.

| Method/Basis:  | $ T_{DA} $ (eV) |        |        |        |        |
|----------------|-----------------|--------|--------|--------|--------|
|                | Molecule        |        |        |        |        |
|                | 1               | 2      | 3      | 4      | 5      |
| HF/STO-3G      | 0.5828          | 0.2392 | 0.0579 | 0.0667 | 0.0204 |
| HF/STO-6G      | 0.5778          | 0.2390 | 0.0571 | 0.0670 | 0.0202 |
| HF/Def2-SVP    | 0.7233          | 0.2275 | 0.0631 | 0.0428 | 0.0284 |
| HF/3-21G       | 0.6447          | 0.2310 | 0.0641 | 0.0536 | 0.0339 |
| HF/6-31G       | 0.6308          | 0.2169 | 0.0622 | 0.0522 | 0.0310 |
| HF/6-31G(d)    | 0.6281          | 0.2066 | 0.0577 | 0.0450 | 0.0264 |
| HF/6-31G(p)    | 0.6343          | 0.2166 | 0.0577 | 0.0440 | 0.0309 |
| HF/6-31G(d,p)  | 0.6287          | 0.2034 | 0.0576 | 0.0394 | 0.0267 |
| HF/6-31G(2d,p) | 0.6302          | 0.2032 | 0.0572 | 0.0391 | 0.0263 |
| HF/6-311G      | 0.6565          | 0.2210 | 0.0651 | 0.0473 | 0.0322 |
| HF/6-311G(d)   | 0.6381          | 0.2059 | 0.0572 | 0.0398 | 0.0266 |
| HF/6-311G(p)   | 0.6542          | 0.2221 | 0.0655 | 0.0453 | 0.0314 |
| HF/6-311G(d,p) | 0.6405          | 0.2052 | 0.0572 | 0.0397 | 0.0270 |

|                    |        |        |        |        |        |
|--------------------|--------|--------|--------|--------|--------|
| HF/6-311G(2d,p)    | 0.6312 | 0.2039 | 0.0572 | 0.0393 | 0.0270 |
| HF/6-311G(2df,2pd) | 0.6207 | 0.1990 | 0.0556 | 0.0385 | 0.0266 |
| HF/TZV(p)          | 0.8702 | 0.3424 | 0.1132 | 0.0703 | 0.0481 |
| HF/TZV(2p)         | 0.8148 | 0.3382 | 0.1099 | 0.0656 | 0.0371 |
| HF/Def2-TZVP       | 0.6209 | 0.1975 | 0.0545 | 0.0381 | 0.0262 |
| HF/Def2-TZVPP      | 0.6173 | 0.1975 | 0.0545 | 0.0381 | 0.0381 |
| HF/6-31+G(d,p)     | 0.8086 | 0.3843 | 0.1073 | 0.0829 | 0.0616 |
| HF/6-31+G(2d,p)    | 0.8001 | 0.4560 | 0.4049 | DNC    | DNC    |
| HF/6-311+G         | 0.9116 | 0.3029 | 0.2202 | 0.0838 | 0.0515 |
| HF/6-311+G(d,p)    | 0.9996 | 0.4875 | 0.1269 | 0.0532 | 0.0336 |
| HF/6-311+G(2d,p)   | 1.2561 | 0.5085 | 0.1016 | 0.0833 | 0.0543 |

DNC= data not converged

**Table S3.** Full tabulation of calculated  $T_{DA}$  (eV) coupling elements for Set B as a function of density functional type and orbital localization method, using the 6-311G(2df,2pd) basis set. MAE error presented with respect to experimental measurements of  $T_{DA}$  (photoelectron spectroscopy experiments<sup>40</sup> determining  $IP_1$  and  $IP_2$ , such that  $T_{DA}$  is  $\frac{1}{2}\Delta IP$ )

|          |                                      | Pipek-Mezey Localization applied to $T_{DA}$ (eV) predictions |       |       |       |       |       |        |        |       |         |       |
|----------|--------------------------------------|---------------------------------------------------------------|-------|-------|-------|-------|-------|--------|--------|-------|---------|-------|
| Molecule | Expt. <sup>40</sup><br>$T_{DA}$ (eV) | B3LYP                                                         | BLYP  | PBE   | PBE0  | M06-L | M06   | M06-2X | M06-HF | B97-D | wB97X-D | RHF   |
| 4        | 0.16                                 | 0.164                                                         | 0.148 | 0.159 | 0.181 | 0.160 | 0.164 | 0.206  | 0.281  | 0.153 | 0.195   | 0.199 |
| 5        | 0.435                                | 0.509                                                         | 0.473 | 0.491 | 0.542 | 0.494 | 0.515 | 0.580  | 0.687  | 0.480 | 0.566   | 0.621 |
| 6        | 0.43                                 | 0.496                                                         | 0.473 | 0.445 | 0.484 | 0.447 | 0.469 | 0.472  | 0.517  | 0.460 | 0.490   | 0.652 |
| 7        | 0.22                                 | 0.195                                                         | 0.175 | 0.180 | 0.209 | 0.192 | 0.198 | 0.244  | 0.317  | 0.180 | 0.226   | 0.252 |
| 8        | 0.63                                 | 0.798                                                         | 0.737 | 0.762 | 0.837 | 0.790 | 0.794 | 0.869  | 1.037  | 0.751 | 0.881   | 1.026 |
| 9        | 0.215                                | 0.262                                                         | 0.242 | 0.253 | 0.282 | 0.252 | 0.262 | 0.294  | 0.366  | 0.246 | 0.295   | 0.322 |
| 10       | 0.26                                 | 0.343                                                         | 0.326 | 0.351 | 0.371 | 0.341 | 0.344 | 0.393  | 0.462  | 0.332 | 0.395   | 0.374 |
| 11       | 0.09                                 | 0.097                                                         | 0.094 | 0.101 | 0.104 | 0.090 | 0.095 | 0.116  | 0.146  | 0.096 | 0.109   | 0.092 |
|          | MAE Error:                           | 0.059                                                         | 0.028 | 0.048 | 0.074 | 0.048 | 0.050 | 0.092  | 0.172  | 0.044 | 0.089   | 0.137 |
|          |                                      | Boys Localization applied to $T_{DA}$ (eV) predictions        |       |       |       |       |       |        |        |       |         |       |
| Molecule | Expt. <sup>40</sup><br>$T_{DA}$ (eV) | B3LYP                                                         | BLYP  | PBE   | PBE0  | M06-L | M06   | M06-2X | M06-HF | B97-D | wB97X-D | RHF   |
| 4        | 0.16                                 | 0.322                                                         | 0.290 | 0.310 | 0.352 | 0.313 | 0.324 | 0.384  | 0.530  | 0.301 | 0.377   | 0.390 |
| 5        | 0.435                                | 0.986                                                         | 0.913 | 0.951 | 1.051 | 0.966 | 0.995 | 1.124  | 1.332  | 0.930 | 1.099   | 1.184 |
| 6        | 0.43                                 | 0.939                                                         | 0.873 | 0.861 | 0.946 | 0.870 | 0.908 | 0.922  | 0.993  | 0.876 | 0.950   | 1.249 |
| 7        | 0.22                                 | 0.378                                                         | 0.341 | 0.349 | 0.408 | 0.374 | 0.384 | 0.475  | 0.619  | 0.351 | 0.436   | 0.479 |
| 8        | 0.63                                 | 1.561                                                         | 1.429 | 1.410 | 1.615 | 1.406 | 1.502 | 1.678  | 1.993  | 1.400 | 1.660   | 2.082 |
| 9        | 0.215                                | 0.511                                                         | 0.469 | 0.789 | 0.550 | 0.492 | 0.511 | 0.577  | 0.705  | 0.480 | 0.578   | 0.612 |
| 10       | 0.26                                 | 0.658                                                         | 0.629 | 0.681 | 0.714 | 0.652 | 0.659 | 0.760  | 0.884  | 0.638 | 0.753   | 0.698 |
| 11       | 0.09                                 | 0.187                                                         | 0.183 | 0.190 | 0.202 | 0.180 | 0.184 | 0.232  | 0.287  | 0.181 | 0.209   | 0.171 |
|          | MAE error:                           | 0.388                                                         | 0.336 | 0.388 | 0.425 | 0.352 | 0.378 | 0.464  | 0.613  | 0.340 | 0.453   | 0.553 |
|          |                                      | E-R Localization applied to $T_{DA}$ (eV) predictions         |       |       |       |       |       |        |        |       |         |       |
| Molecule | Expt. <sup>40</sup><br>$T_{DA}$ (eV) | B3LYP                                                         | BLYP  | PBE   | PBE0  | M06-L | M06   | M06-2X | M06-HF | B97-D | wB97X-D | RHF   |

|           |                   |              |              |              |              |              |              |              |              |              |              |              |
|-----------|-------------------|--------------|--------------|--------------|--------------|--------------|--------------|--------------|--------------|--------------|--------------|--------------|
| <b>4</b>  | <b>0.16</b>       | 0.305        | 0.275        | 0.298        | 0.357        | 0.550        | 0.309        | 0.389        | 0.550        | 0.305        | 0.364        | 0.366        |
| <b>5</b>  | <b>0.435</b>      | 0.951        | 0.881        | 0.929        | 1.019        | 1.294        | 0.958        | 1.097        | 1.293        | 0.900        | 1.066        | 1.152        |
| <b>6</b>  | <b>0.43</b>       | 0.915        | 0.852        | 0.846        | 0.926        | 0.972        | 0.890        | 0.905        | 0.972        | 0.858        | 0.932        | 1.219        |
| <b>7</b>  | <b>0.22</b>       | 0.364        | 0.326        | 0.342        | 0.394        | 0.598        | 0.370        | 0.465        | 0.598        | 0.180        | 0.424        | 0.465        |
| <b>8</b>  | <b>0.63</b>       | 1.388        | 1.285        | 1.336        | 1.464        | 1.836        | 1.385        | 1.560        | 1.836        | 1.295        | 1.537        | 1.754        |
| <b>9</b>  | <b>0.215</b>      | 0.484        | 0.445        | 0.476        | 0.526        | 0.678        | 0.488        | 0.553        | 0.678        | 0.458        | 0.551        | 0.592        |
| <b>10</b> | <b>0.26</b>       | 0.626        | 0.637        | 0.683        | 0.684        | 0.909        | 0.629        | 0.730        | 0.909        | 0.644        | 0.769        | 0.671        |
| <b>11</b> | <b>0.09</b>       | 0.178        | 0.173        | 0.188        | 0.194        | 0.280        | 0.176        | 0.223        | 0.280        | 0.177        | 0.203        | 0.166        |
|           | <b>MAE Error:</b> | <b>0.347</b> | <b>0.304</b> | <b>0.332</b> | <b>0.391</b> | <b>0.585</b> | <b>0.346</b> | <b>0.435</b> | <b>0.585</b> | <b>0.307</b> | <b>0.426</b> | <b>0.493</b> |

## Basis Set References

|                 |                                                                                    |
|-----------------|------------------------------------------------------------------------------------|
| STO-3G          | W.J. Hehre, R.F. Stewart and J.A. Pople, J. Chem. Phys. 2657 (1969).               |
| STO-6G          | W.J. Hehre, R.F. Stewart and J.A. Pople, J. Chem. Phys. 2657 (1969).               |
| 3-21G           | J.S. Binkley, J.A. Pople, W.J. Hehre, J. Am. Chem. Soc 102 939 (1980).             |
| 6-31G           | W.J. Hehre, R. Ditchfield and J.A. Pople, J. Chem. Phys. 56, 2257 (1972).          |
| 6-31G(d)        | W.J. Hehre, R. Ditchfield and J.A. Pople, J. Chem. Phys. 56, 2257 (1972).          |
| 6-31G(p)        | W.J. Hehre, R. Ditchfield and J.A. Pople, J. Chem. Phys. 56, 2257 (1972).          |
| 6-31+G          | W.J. Hehre, R. Ditchfield and J.A. Pople, J. Chem. Phys. 56, 2257 (1972).          |
| 6-31G(d,p)      | W.J. Hehre, R. Ditchfield and J.A. Pople, J. Chem. Phys. 56, 2257 (1972).          |
| 6-31+G(d,p)     | W.J. Hehre, R. Ditchfield and J.A. Pople, J. Chem. Phys. 56, 2257 (1972).          |
| 6-31G(2d,p)     | W.J. Hehre, R. Ditchfield and J.A. Pople, J. Chem. Phys. 56, 2257 (1972).          |
| 6-31+G(2d,p)    | W.J. Hehre, R. Ditchfield and J.A. Pople, J. Chem. Phys. 56, 2257 (1972).          |
| 6-311G          | R. Krishnan, J.S. Binkley, R. Seeger and J.A. Pople, J. Chem. Phys. 72, 650 (1980) |
| 6-311G(d)       | R. Krishnan, J.S. Binkley, R. Seeger and J.A. Pople, J. Chem. Phys. 72, 650 (1980) |
| 6-311G(p)       | R. Krishnan, J.S. Binkley, R. Seeger and J.A. Pople, J. Chem. Phys. 72, 650 (1980) |
| 6-311+G         | R. Krishnan, J.S. Binkley, R. Seeger and J.A. Pople, J. Chem. Phys. 72, 650 (1980) |
| 6-311G(d,p)     | R. Krishnan, J.S. Binkley, R. Seeger and J.A. Pople, J. Chem. Phys. 72, 650 (1980) |
| 6-311+G(d,p)    | R. Krishnan, J.S. Binkley, R. Seeger and J.A. Pople, J. Chem. Phys. 72, 650 (1980) |
| 6-311G(2d,p)    | R. Krishnan, J.S. Binkley, R. Seeger and J.A. Pople, J. Chem. Phys. 72, 650 (1980) |
| 6-311+G(2d,p)   | R. Krishnan, J.S. Binkley, R. Seeger and J.A. Pople, J. Chem. Phys. 72, 650 (1980) |
| 6-311G(2df,2pd) | R. Krishnan, J.S. Binkley, R. Seeger and J.A. Pople, J. Chem. Phys. 72, 650 (1980) |
| Def2-SVP        | F. Weigend and R. Ahlrichs, Phys. Chem. Chem. Phys., 7, 3297 (2005).               |
| Def2-TZVP       | F. Weigend and R. Ahlrichs, Phys. Chem. Chem. Phys., 7, 3297 (2005).               |
| Def2-TZVPP      | F. Weigend and R. Ahlrichs, Phys. Chem. Chem. Phys., 7, 3297 (2005).               |
| TZV(p)          | A. Schafer, C. Huber and R. Ahlrichs, J. Chem. Phys. 100, 5829 (1994).             |
| TZV(2p)         | A. Schafer, C. Huber and R. Ahlrichs, J. Chem. Phys. 100, 5829 (1994).             |
